# Supplementary material for: New Betulin Derivatives with Nitrogen Heterocyclic Moiety—Synthesis and Anticancer Activity In Vitro
Source: MDPI journal article supplement (doi:10.3390/biom12101540), 2022-10-21
Supplement: s1 [file s1]

## Supplementary Materials

# New Betulin Derivatives with Nitrogen Heterocyclic Moiety—Synthesis and Anticancer Activity of *In Vitro*

Ewa Bębenek <sup>1,\*</sup>, Elwira Chrobak <sup>1,\*</sup>, Zuzanna Rzepka <sup>2</sup> and Dorota Wrześniok <sup>2</sup>

<sup>1</sup> Department of Organic Chemistry, Faculty of Pharmaceutical Sciences in Sosnowiec, Medical University of Silesia in Katowice, 4 Jagiellońska Str., 41-200 Sosnowiec, Poland

<sup>2</sup> Department of Pharmaceutical Chemistry, Faculty of Pharmaceutical Sciences in Sosnowiec, Medical University of Silesia in Katowice, 4 Jagiellońska Str., 41-200 Sosnowiec, Poland

\* Correspondence: ebebenek@sum.edu.pl (EB); echrobak@sum.edu.pl (EC); Tel.: +48-032-364-16-66 (EB); Tel.: +48-032-364-16-69 (EC)

### LIST OF CONTENTS

**Figure S1.** <sup>1</sup>H-NMR spectrum for EB366 (600 MHz, CDCl<sub>3</sub>)

**Figure S2.** <sup>13</sup>C-NMR spectrum for EB366 (150 MHz, CDCl<sub>3</sub>)

**Figure S3.** HRMS spectrum for EB366

**Figure S4.** <sup>1</sup>H-NMR spectrum for EB367 (600 MHz, CDCl<sub>3</sub>)

**Figure S5.** <sup>13</sup>C-NMR spectrum for EB367 (150 MHz, CDCl<sub>3</sub>)

**Figure S6.** HRMS spectrum for EB367

**Table S1.** Cytotoxic *in vitro* activity of indole-functionalized derivatives of betulin, expressed as IC<sub>50</sub> values.

**Table S2.** Druglikeness of EB367 predicted using the SwissADME.

**Table S3.** The *in silico* predictions of human proteins most likely interacting with EB367 computed using SwissTargetPrediction tool.

**Table S4.** Prediction of the ADME profile of compound EB367 based on computer calculations using admetSAR.

**Figure S1.**  $^1\text{H}$ -NMR spectrum for EB366 (600 MHz,  $\text{CDCl}_3$ )

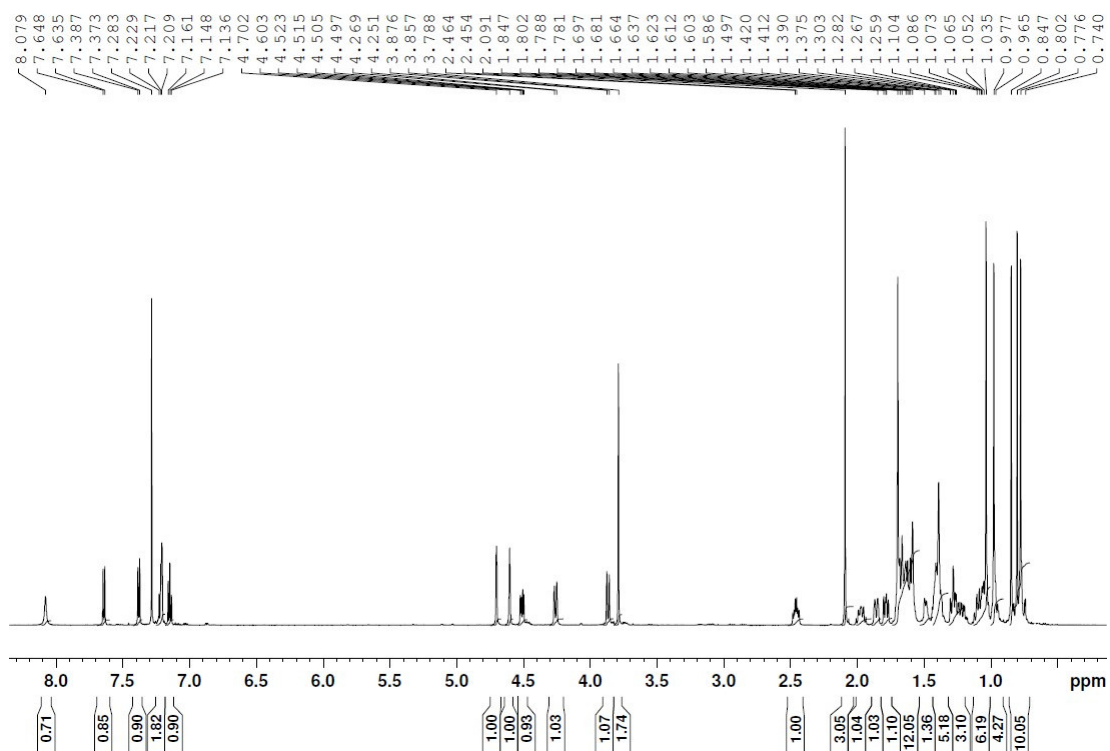

**Figure S2.**  $^{13}\text{C}$ -NMR spectrum for EB366 (150 MHz,  $\text{CDCl}_3$ )

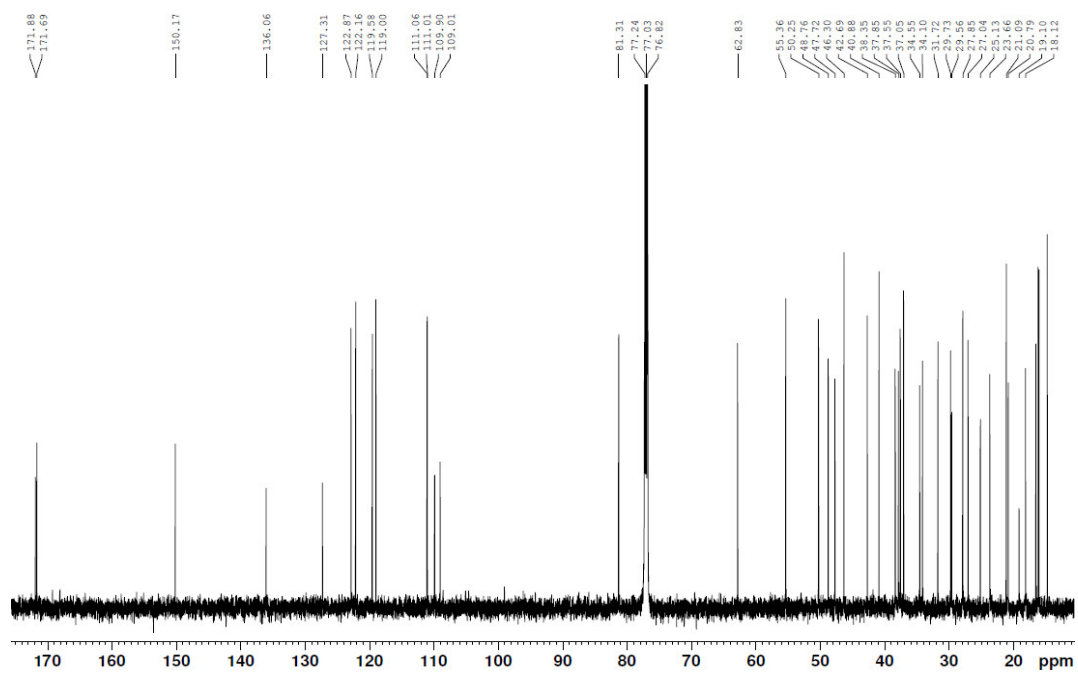

**Figure S3.** HRMS spectrum for EB366

|               |                          |            |               |
|---------------|--------------------------|------------|---------------|
| Analysis Name | D:\Data\EB 366           |            |               |
| Method        | APCI_low_mass_negative.m | Operator   | KM            |
| Sample Name   | 1-tolil                  | Instrument | impact II     |
| Comment       |                          |            | 1825265.10082 |

|                              |          |                      |          |                  |           |
|------------------------------|----------|----------------------|----------|------------------|-----------|
| <b>Acquisition Parameter</b> |          |                      |          |                  |           |
| Source Type                  | APCI     | Ion Polarity         | Negative | Set Nebulizer    | 2.0 Bar   |
| Focus                        | Active   | Set Capillary        | 4000 V   | Set Dry Heater   | 200 °C    |
| Scan Begin                   | 100 m/z  | Set End Plate Offset | -500 V   | Set Dry Gas      | 4.0 l/min |
| Scan End                     | 1600 m/z | Set Charging Voltage | 2000 V   | Set Divert Valve | Source    |
|                              |          | Set Corona           | 15000 nA | Set APCI Heater  | 450 °C    |

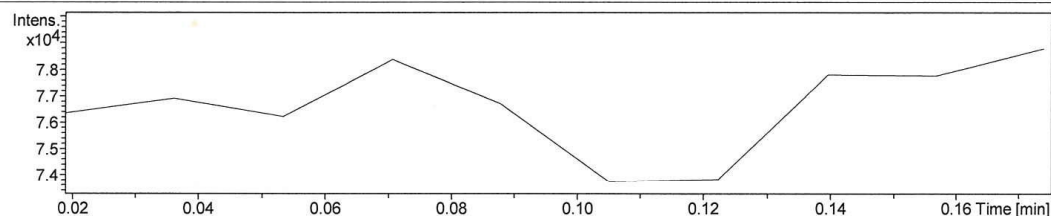

-MS, 0.0-0.1min #2-6

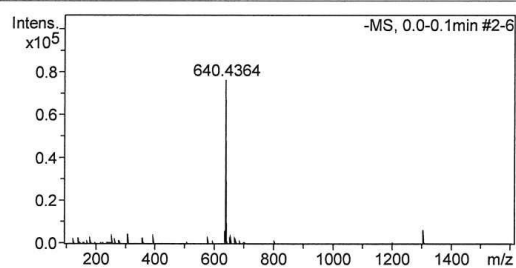

| # | m/z      | Res.  | S/N    | I     | I %   | FWHM   |
|---|----------|-------|--------|-------|-------|--------|
| 1 | 640.4364 | 12004 | 3626.8 | 76425 | 100.0 | 0.0534 |

**Figure S4.** <sup>1</sup>H-NMR spectrum for EB367 (600 MHz, CDCl<sub>3</sub>)

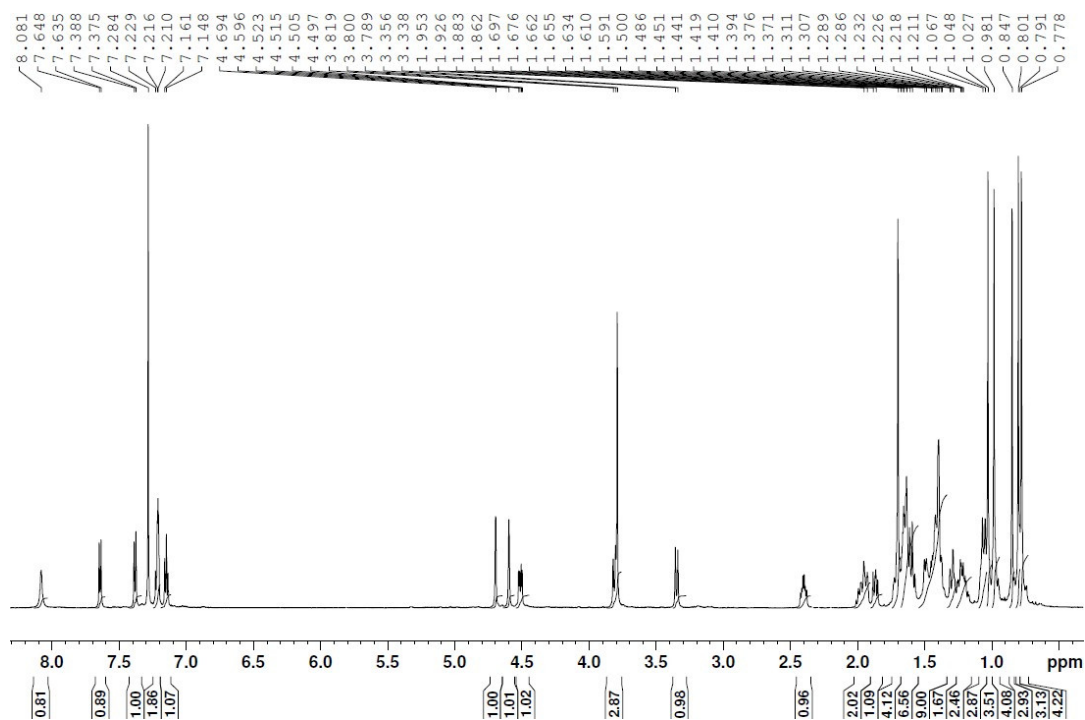

**Figure S5.**  $^{13}\text{C}$ -NMR spectrum for EB367 (150 MHz,  $\text{CDCl}_3$ )

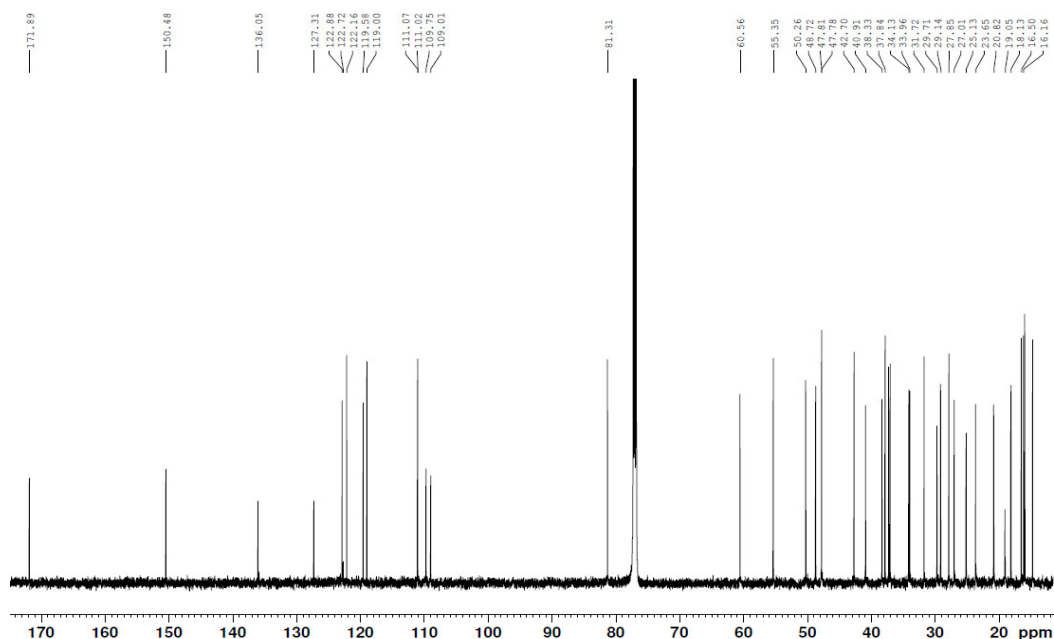

**Figure S6.** HRMS spectrum for EB367

|               |                          |            |           |               |
|---------------|--------------------------|------------|-----------|---------------|
| Analysis Name | D:\Data\EB 367           | Operator   | KM        |               |
| Method        | APCI_low_mass_negative.m | Instrument | impact II | 1825265.10082 |
| Sample Name   | 1-tolil                  |            |           |               |
| Comment       |                          |            |           |               |

**Acquisition Parameter**

|             |          |                      |          |                  |           |
|-------------|----------|----------------------|----------|------------------|-----------|
| Source Type | APCI     | Ion Polarity         | Negative | Set Nebulizer    | 2.0 Bar   |
| Focus       | Active   | Set Capillary        | 4000 V   | Set Dry Heater   | 200 °C    |
| Scan Begin  | 100 m/z  | Set End Plate Offset | -500 V   | Set Dry Gas      | 4.0 l/min |
| Scan End    | 1600 m/z | Set Charging Voltage | 2000 V   | Set Divert Valve | Source    |
|             |          | Set Corona           | 15000 nA | Set APCI Heater  | 450 °C    |

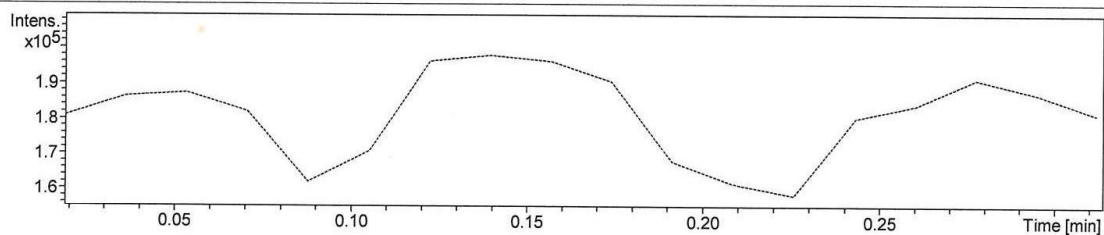

**-MS, 0.1-0.1min #3-7**

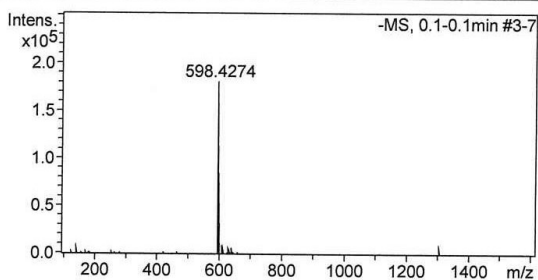

| # | m/z      | Res.  | S/N    | I      | I %   | FWHM   |
|---|----------|-------|--------|--------|-------|--------|
| 1 | 598.4274 | 12267 | 8529.0 | 180533 | 100.0 | 0.0488 |

**Table S1.** Cytotoxic *in vitro* activity of indole-functionalized derivatives of betulin, expressed as IC<sub>50</sub> values.

|              | Cell line |      |     |            |                       |      |       |       |
|--------------|-----------|------|-----|------------|-----------------------|------|-------|-------|
|              | NHF       | A375 | C32 | MDA-MB-231 | MCF-7                 | A549 | DLD-1 | HT-29 |
| <b>EB366</b> | Neg       | Neg  | Neg | Neg        | 100 µg/ml<br>(167 µM) | Neg  | Neg   | Neg   |
| <b>EB367</b> | Neg       | Neg  | Neg | Neg        | 21 µg/ml<br>(35 µM)   | Neg  | Neg   | Neg   |

Neg – negative in concentrations used; NHF – normal human fibroblasts

**Table S2.** Druglikeness of EB367 predicted using the SwissADME.

| Rule name | Number of violations | Violation                            |
|-----------|----------------------|--------------------------------------|
| Lipinski  | 2                    | MW>500, MLOGP>4.15                   |
| Ghose     | 4                    | MW>480, WLOGP>5.6, MR>130, #atoms>70 |
| Veber     | 0                    | ----                                 |
| Egan      | 1                    | WLOGP>5.88                           |
| Muegge    | 1                    | XLOGP3>5                             |

Ghose rule:  $160 \leq MW \leq 480$ ,  $-0.4 \leq WLOGP \leq 5.6$ ,  $40 \leq MR \leq 130$ ,  $20 \leq \text{atoms} \leq 70$ . 3

Veber rule: rotatable bond  $\leq 10$ , TPSA  $\leq 140$ .

Egan rule: WLOG  $\leq 5.88$ , TPSA  $\leq 131.6$ .

Muegge rule:  $200 \leq MW \leq 600$ ,  $-2 \leq XLOGP \leq 5$ , TPSA  $\leq 150$ , num. rings  $\leq 7$ , num. carbon  $> 4$ , num. heteroatoms  $> 1$ , number of rotatable bonds  $\leq 15$ , H-BA  $\leq 10$ , H-BD  $\leq 5$ .

**Table S3.** The *in silico* predictions of human proteins most likely interacting with EB367 computed using SwissTargetPrediction tool.

| Target               | Common name | Uniport ID | ChEMBL ID  | Target class     | probability    |
|----------------------|-------------|------------|------------|------------------|----------------|
| Cytochrome P450 19A1 | CYP19A1     | P11511     | CHEMBL1978 | Cytochrome P450  | 0.074564954199 |
| Cytochrome P450 17A1 | CYP17A1     | P05093     | CHEMBL3522 | Cytochrome P450  | 0.074564954199 |
| Androgen Receptor    | AR          | P10275     | CHEMBL1871 | Nuclear receptor | 0.074564954199 |

**Table S4.** Prediction of the ADME profile of compound EB367 based on computer calculations using admetSAR.

| Parameter                                                 | Value        | Probability |
|-----------------------------------------------------------|--------------|-------------|
| <b>Absorption</b>                                         |              |             |
| Human intestinal absorption (HIA)                         | +            | 0.9874      |
| Caco-2 permeability                                       | -            | 0.8093      |
| Human oral bioavailability                                | -            | 0.6000      |
| <b>Distribution</b>                                       |              |             |
| Subcellular localization                                  | Mitochondria | 0.7201      |
| Blood brain barrier (BBB) permeability                    | +            | 0.9407      |
| Organic Anion-Transporting Polypeptide (OATP) inhibitors: |              |             |
| OATP 2B1                                                  | -            | 0.5688      |
| OATP 1B1                                                  | +            | 0.8642      |
| OATP 1B3                                                  | +            | 0.8896      |
| Multidrug And Toxin Extrusion Transporter 1 (MATE1)       | -            | 0.9212      |

|                                                     |   |        |
|-----------------------------------------------------|---|--------|
| Organic Cation Transport Protein 2 (OCT2) inhibitor | - | 0.5750 |
| Bile Salt Export Pump (BSEP) inhibitor              | + | 0.9783 |
| P-glycoprotein inhibitor                            | + | 0.7114 |
| P-glycoprotein substrate                            | + | 0.5917 |
| <b>Metabolism</b>                                   |   |        |
| Cytochrome P450:                                    |   |        |
| CYP450 3A4 substrate                                | + | 0.7439 |
| CYP450 2C9 substrate                                | - | 0.8097 |
| CYP450 2D6 substrate                                | - | 0.8337 |
| CYP450 3A4 inhibition                               | + | 0.7790 |
| CYP450 2C9 inhibition                               | - | 0.5985 |
| CYP450 2C19 inhibition                              | - | 0.5225 |
| CYP450 2D6 inhibition                               | - | 0.8505 |
| CYP450 1A2 inhibition                               | + | 0.5688 |
| CYP inhibitory promiscuity                          | + | 0.8460 |
